# Supplementary figures and images for: A Nomogram for Predicting the Risk of Peritoneal Dialysis-Associated Peritonitis in Patients with End-Stage Renal Disease Undergoing Peritoneal Dialysis: Model Development and Validation Study
Source: Research Square preprint supplement (doi:10.21203/rs.3.rs-5515979/v1), 2025-03-31

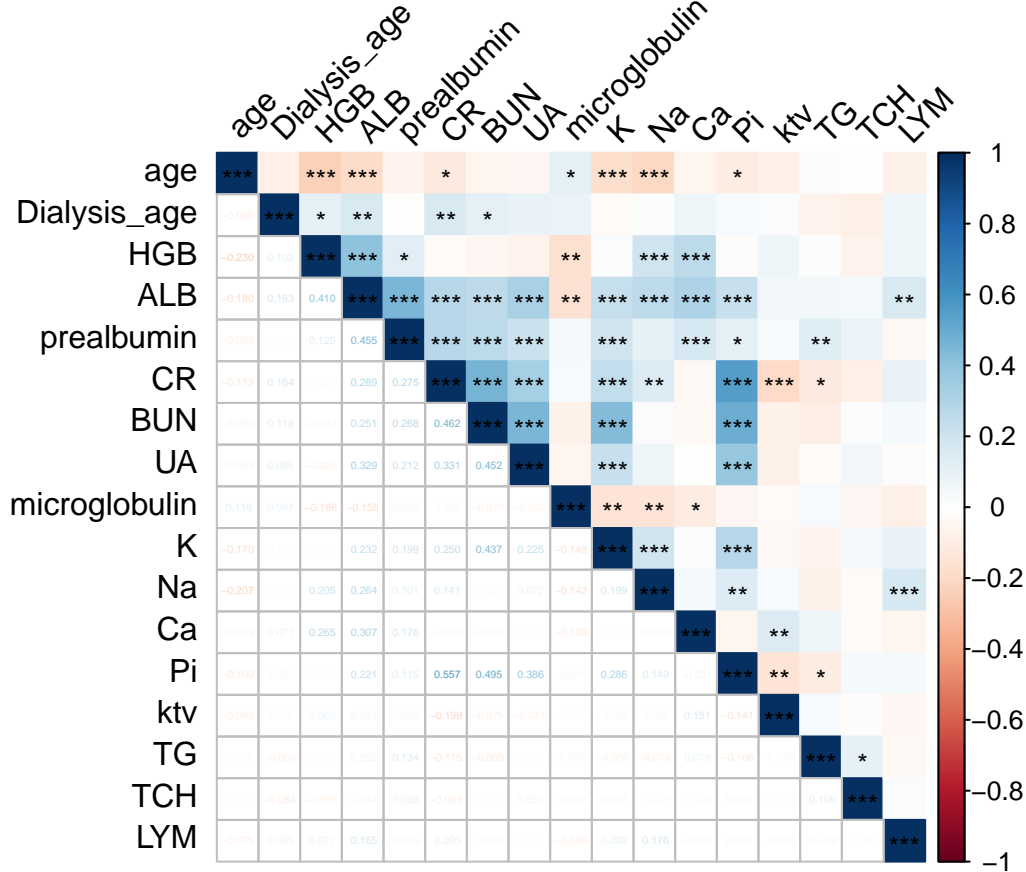

Supplement: Supplementary file 1 [file Correlation heat map.pdf › Attachments/Correlation heat map.pdf]

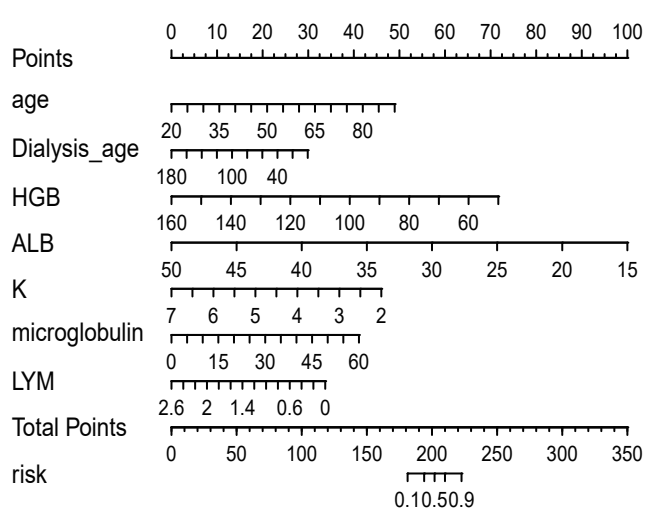

**a.train:test=0.5:0.5**

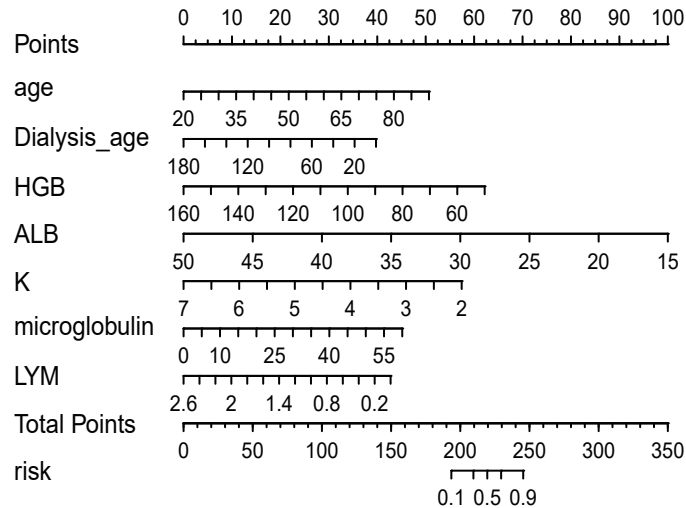

**b.train:test=0.65:0.35**

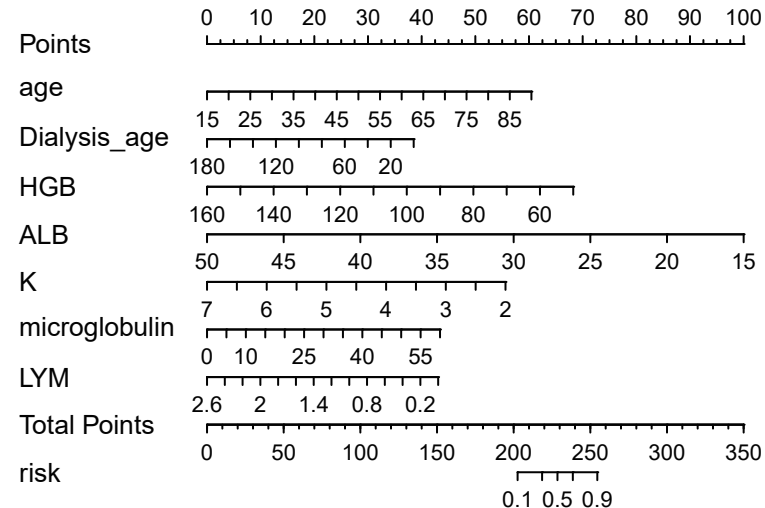

**c.train:test=0.75:0.25**

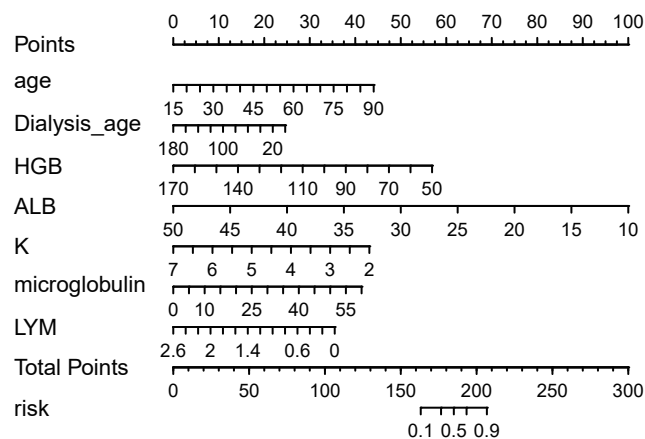

**d.train:test=0.85:0.15**

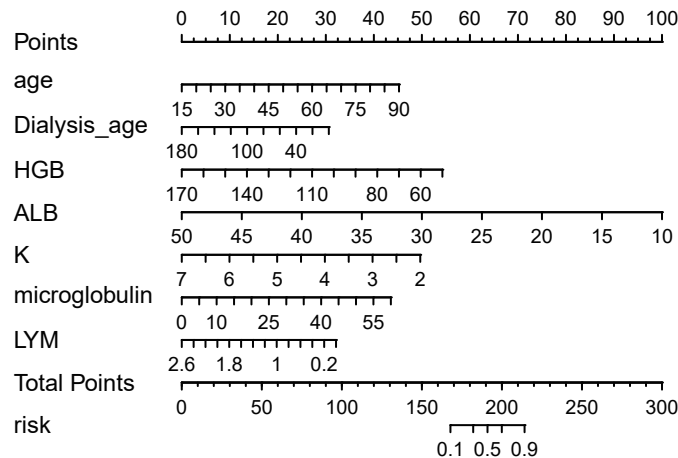

**e.train:test=1:0**

Supplement: Supplementary file 2 [file Nomo Sensitivity ANALYSIS.pdf › Attachments/Nomo Sensitivity ANALYSIS.pdf]

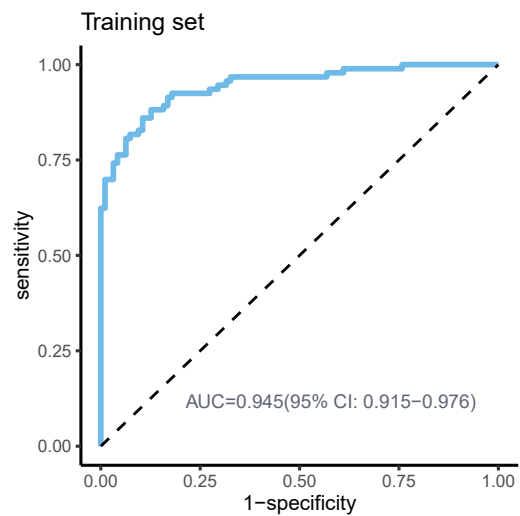

**a.train:test=0.5:0.5**

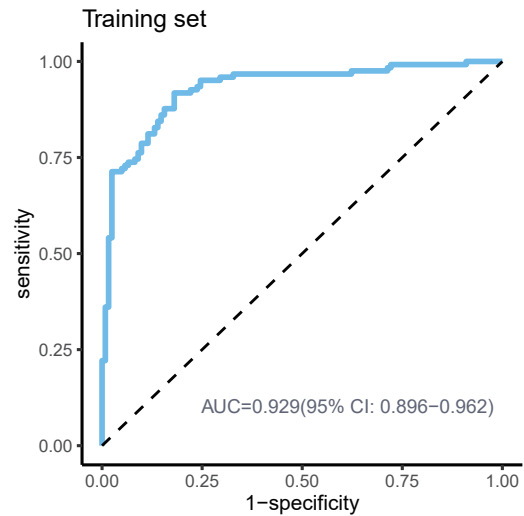

**b.train:test=0.65:0.35**

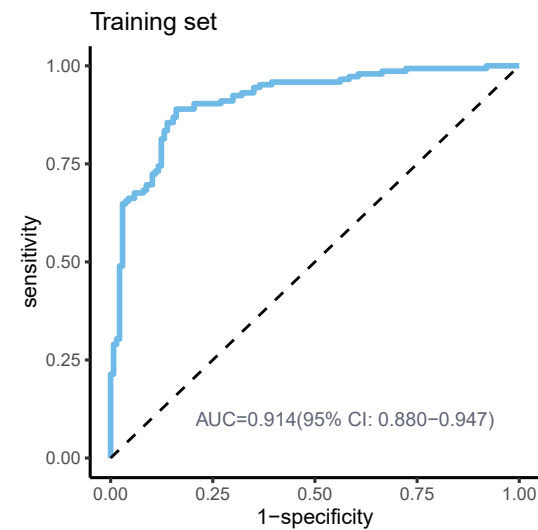

**c.train:test=0.75:0.25**

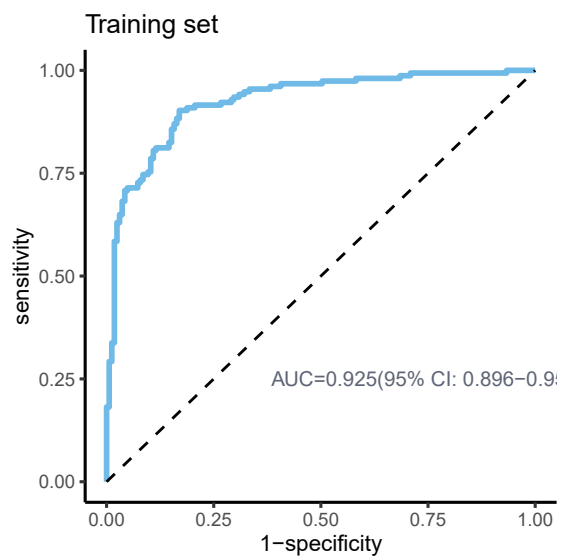

**d.train:test=0.85:0.15**

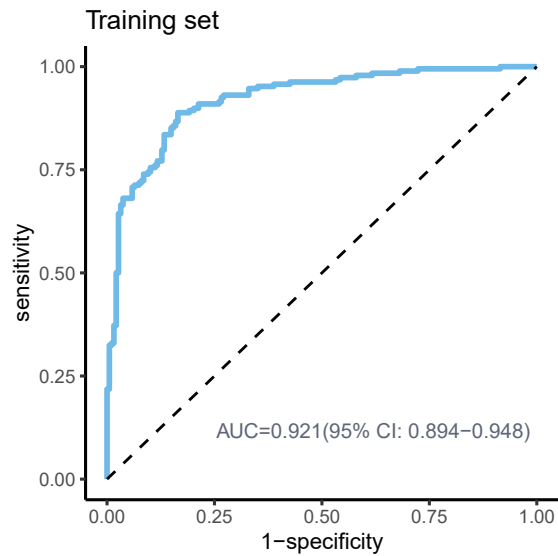

**e.train:test=1:0**

Supplement: Supplementary file 3 [file ROC Sensitivity ANALYSIS.pdf › Attachments/ROC Sensitivity ANALYSIS.pdf]
